# Supplementary material for: Comparison of the human gastric microbiota in hypochlorhydric states arising as a result of Helicobacter pylori-induced atrophic gastritis, autoimmune atrophic gastritis and proton pump inhibitor use
Source: PubMed Central journal article supplement (PMC5667734; doi:10.1371/journal.ppat.1006653), 2017-11-02
Supplement: ppat.1006653.s002.pdf [file ppat.1006653.s002.pdf]

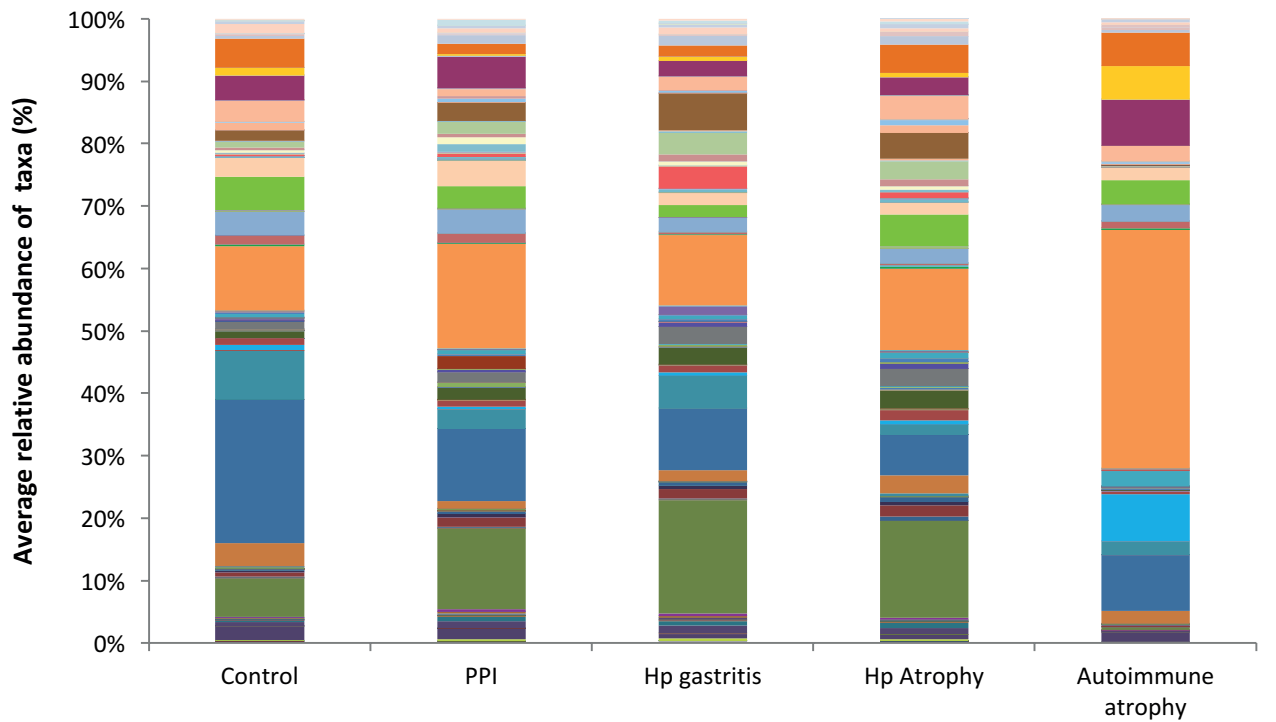

- |                                                          |                                                          |                                                             |                                                             |
|----------------------------------------------------------|----------------------------------------------------------|-------------------------------------------------------------|-------------------------------------------------------------|
| <span style="color: green;">■</span> Fusobacteriaceae    | <span style="color: orange;">■</span> Streptococcaceae   | <span style="color: cyan;">■</span> Flavobacteriaceae       | <span style="color: darkblue;">■</span> Actinomycetaceae    |
| <span style="color: brown;">■</span> Pasteurellaceae     | <span style="color: purple;">■</span> Campylobacteraceae | <span style="color: darkred;">■</span> Propionibacteriaceae | <span style="color: brown;">■</span> Sphingomonadaceae      |
| <span style="color: peachpuff;">■</span> Neisseriaceae   | <span style="color: grey;">■</span> Xenococcaceae        | <span style="color: purple;">■</span> Lactobacillaceae      | <span style="color: peachpuff;">■</span> Leptotrichiaceae   |
| <span style="color: blue;">■</span> Prevotellaceae       | <span style="color: darkred;">■</span> Planococcaceae    | <span style="color: yellow;">■</span> Enterobacteriaceae    | <span style="color: red;">■</span> Methylobacteriaceae      |
| <span style="color: lightblue;">■</span> Veillonellaceae | <span style="color: teal;">■</span> Paraprevotellaceae   | <span style="color: olive;">■</span> Micrococcaceae         | <span style="color: lightgreen;">■</span> Rhodospirillaceae |
