# Supplementary material for: Comparison of the human gastric microbiota in hypochlorhydric states arising as a result of Helicobacter pylori-induced atrophic gastritis, autoimmune atrophic gastritis and proton pump inhibitor use
Source: PubMed Central journal article supplement (PMC5667734; doi:10.1371/journal.ppat.1006653), 2017-11-02

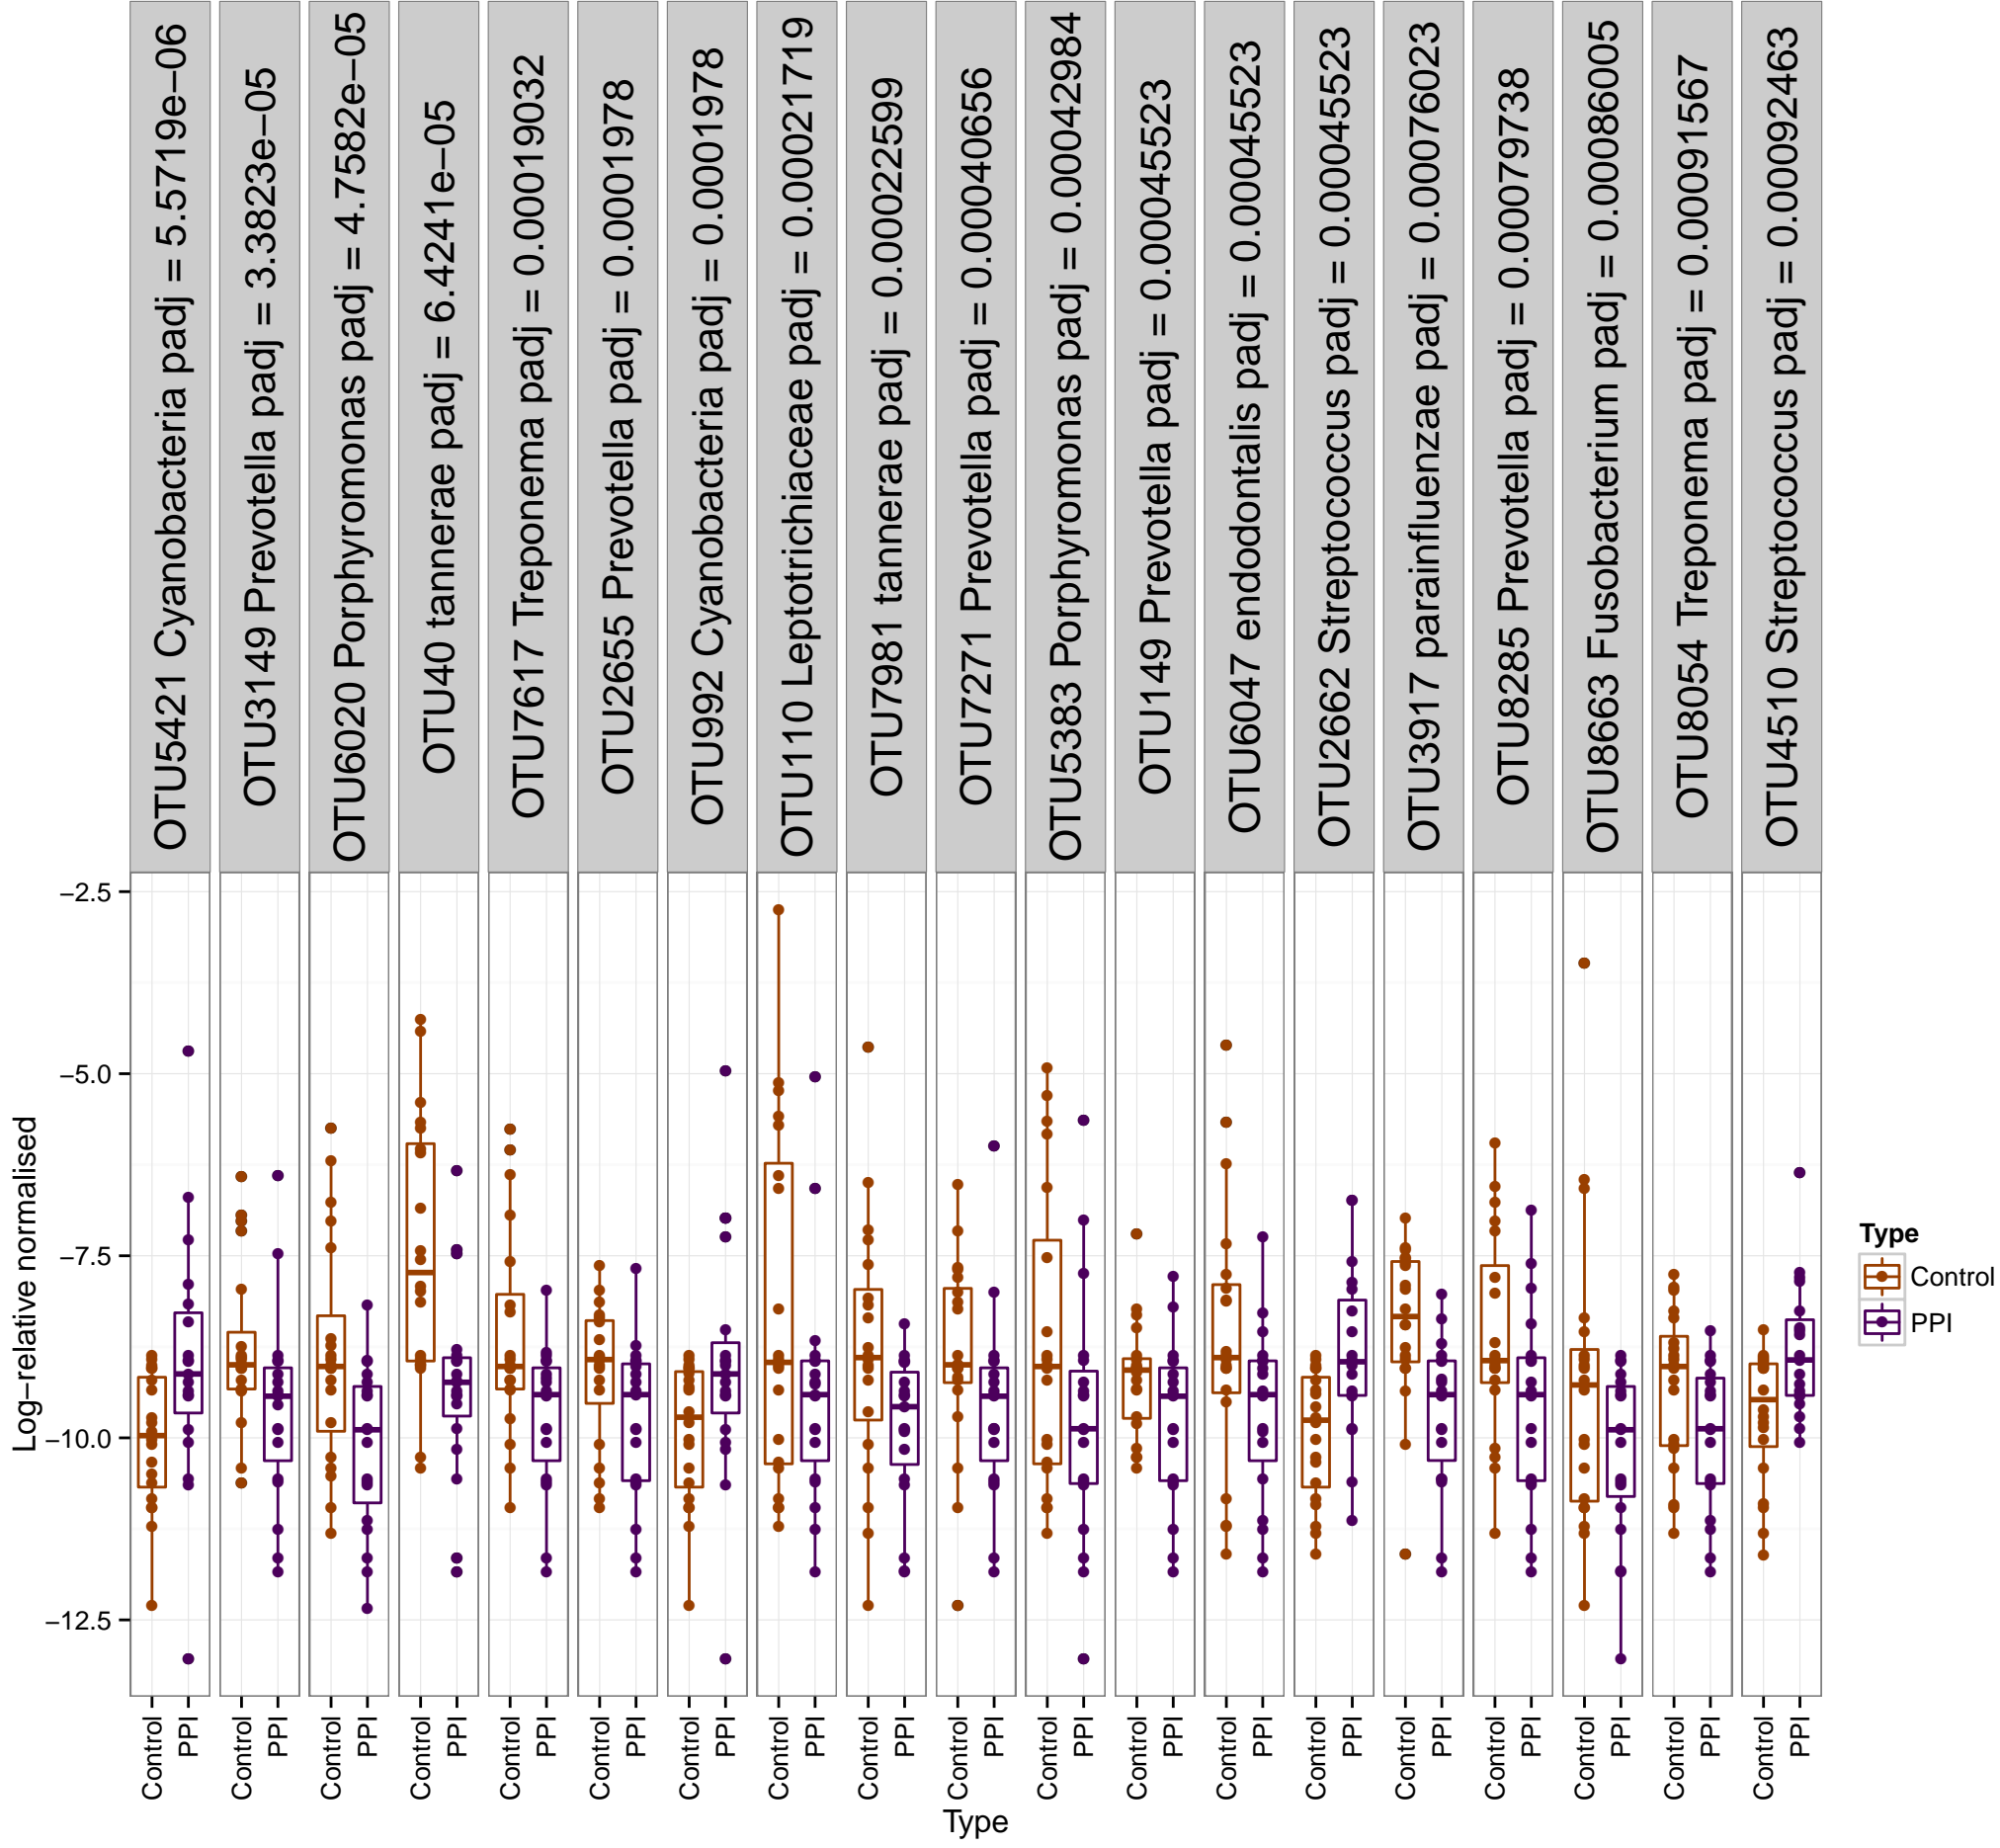

Supplement: ppat.1006653.s003.pdf [file ppat.1006653.s003.pdf]
